# Supplementary material for: Monodisperse core-shell chitosan microcapsules for pH-responsive burst release of hydrophobic drugs
Source: Royal Society of Chemistry journal article supplement (doi:10.1039/c0sm01393e), 2011-01-01
Supplement: c0sm01393e.pdf [file c0sm01393e.pdf]

## Supporting Information

### 5 **Monodisperse Core-shell Chitosan Microcapsules for pH-responsive Burst Release of Hydrophobic Drugs**

Li Liu<sup>a</sup>, Jian-Ping Yang<sup>a</sup>, Xiao-Jie Ju<sup>a</sup>, Rui Xie<sup>a</sup>, Ying-Mei Liu<sup>a</sup>, Wei Wang<sup>a</sup>, Jin-Jin Zhang<sup>a</sup>, Catherine Hui Niu<sup>b</sup> and Liang-Yin Chu<sup>a,\*</sup>

<sup>10</sup> <sup>a</sup>School of Chemical Engineering, Sichuan University, Chengdu, Sichuan, China. Tel: +86 28 8546 0682; E-mail: [chuly@scu.edu.cn](mailto:chuly@scu.edu.cn)

<sup>15</sup> <sup>b</sup>Department of Chemical Engineering, University of Saskatchewan, 57 Campus Drive, Saskatoon, SK S7N 5A9 Canada.

**Move S1.** The acid-triggered burst release process of chitosan microcapsules.

20

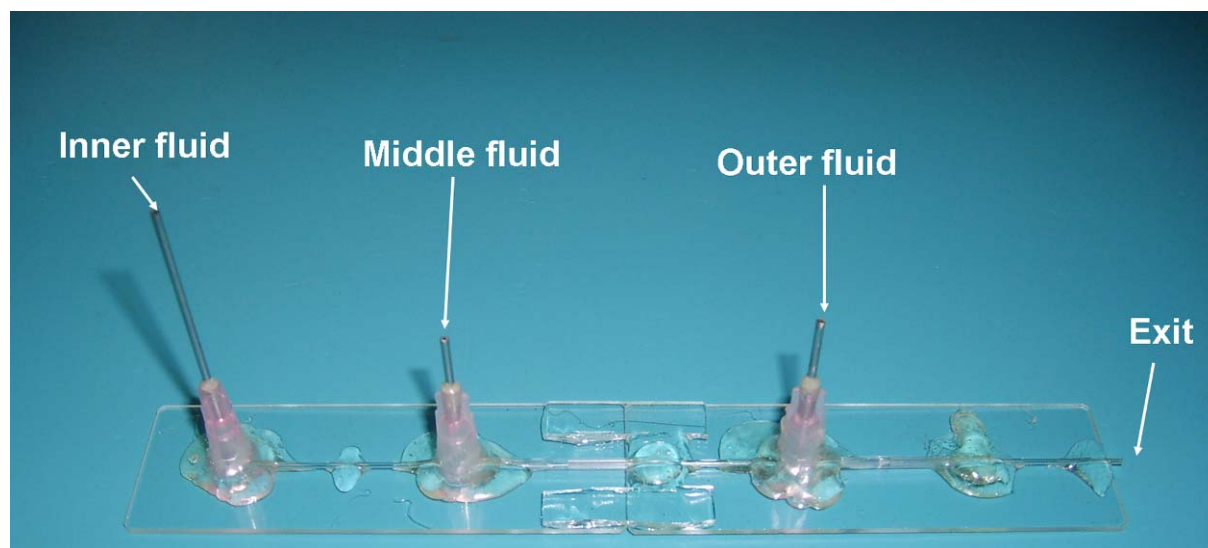

**Figure S1.** A photo of a microfluidic device.

25

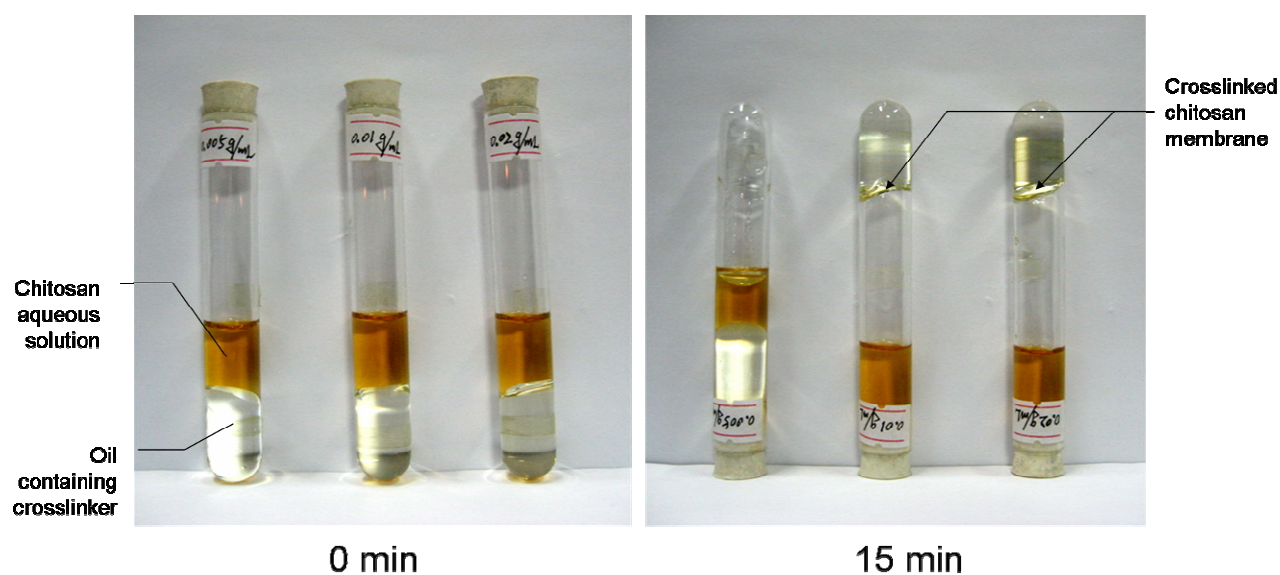

**Figure S2.** Effect of the terephthalaldehyde concentration in the oil phase on the crosslinking reaction at the W/O interface. From the left to the right, the terephthalaldehyde concentrations in the oil phase are 0.005 g/ml, 0.01 g/ml and 0.02 g/ml, respectively.

5

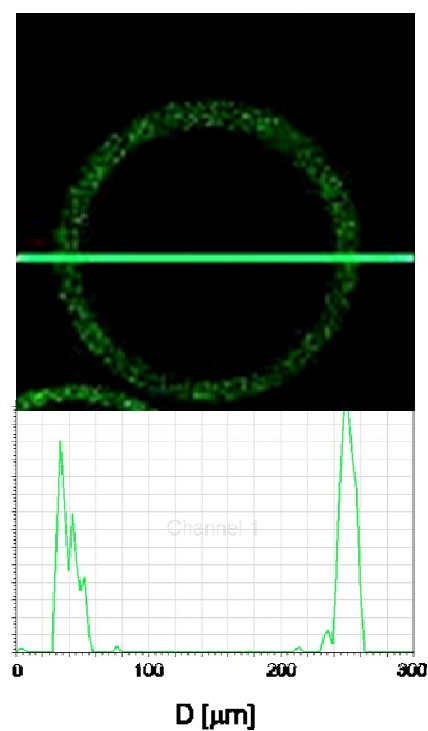

**Figure S3.** CLSM image of a crosslinked chitosan microcapsule and its fluorescence intensity profile.

10
